# Supplementary material for: Environmental Filtering Drives the Assembly of Habitat Generalists and Specialists in the Coastal Sand Microbial Communities of Southern China
Source: PubMed Central journal article supplement (PMC6955893; doi:10.3390/microorganisms7120598), 2019-11-21
Supplement: microorganisms-07-00598-s001.pdf [file microorganisms-07-00598-s001.pdf]

## *Supplementary Materials*

# **Environmental Filtering Drives the Assembly of Habitat Generalists and Specialists in the Coastal Sand Microbial Communities of Southern China**

**Anyi Hu <sup>1,\*</sup>, Hongjie Wang <sup>1,2</sup>, Meixian Cao <sup>1,2</sup>, Azhar Rashid <sup>1,3</sup>, Mingfeng Li <sup>4,\*</sup> and Chang-Ping Yu <sup>1,5</sup>**

<sup>1</sup> CAS Key Laboratory of Urban pollutant Conversion, Institute of Urban Environment, Chinese Academy of Sciences, Xiamen 361021, China; ayhu@iue.ac.cn (A.H.); hjwang@iue.ac.cn (H.W.); mxcao@iue.ac.cn (M.C.); azoo74@yahoo.com (A.R.); cpyu@iue.ac.cn (C.-P.Y.)

<sup>2</sup> University of Chinese Academy of Sciences, Beijing 100049, China

<sup>3</sup> Nuclear Institute for Food and Agriculture, Tarnab, Peshawar 446, Pakistan

<sup>4</sup> School of Biological Science and Biotechnology, Minnan Normal University, Zhangzhou 363000, China; limingfeng@mnnu.edu.cn (M.L.)

<sup>5</sup> Graduate Institute of Environmental Engineering, National Taiwan University, Taipei 106, Taiwan

\* Correspondence: ayhu@iue.ac.cn (A.H.); Tel.: +86-592-6190582 (A.H.); limingfeng@mnnu.edu.cn (M.L.); Tel.: +86-596-2591356 (M.L.)

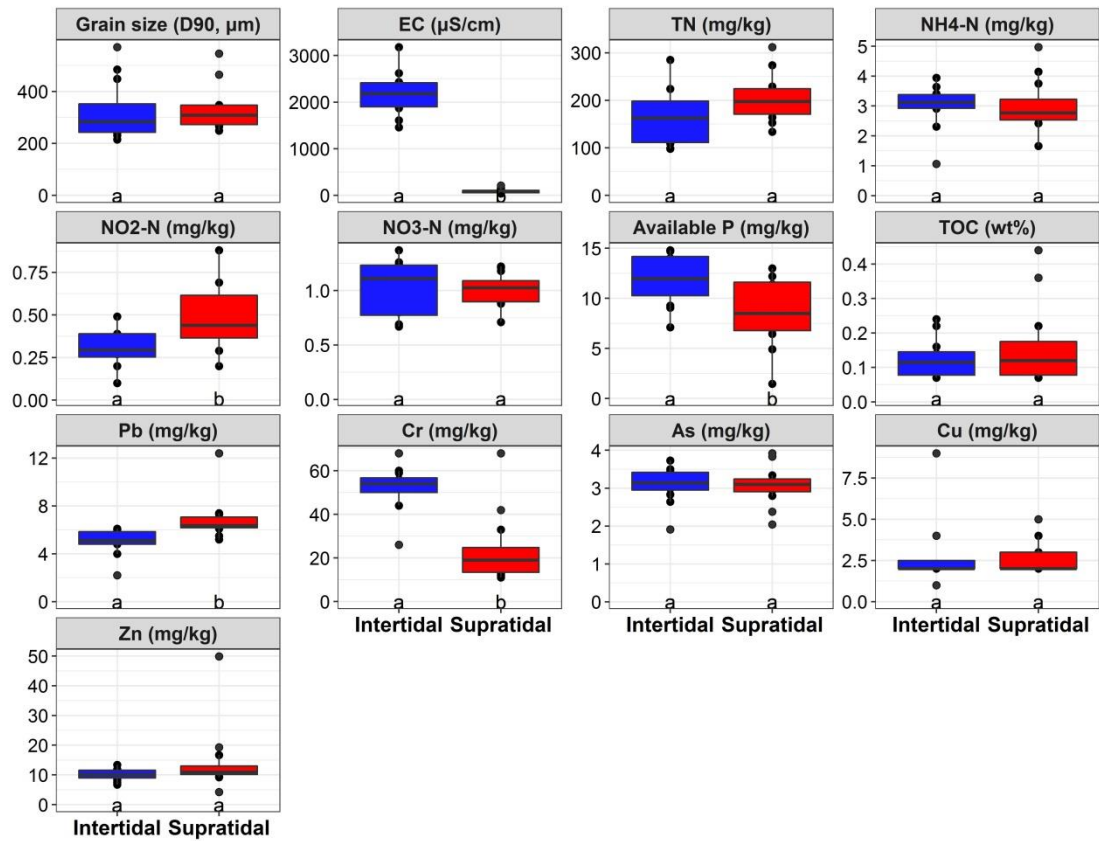

**Fig. S1.** Comparison of 13 environmental variables of the coastal sand sediments collected from the Dongshan Island, China. The different letters indicate significant difference between the intertidal and supratidal zones.
